# Supplementary material
Source: MDPI journal article supplement (https://www.mdpi.com/2073-4352/9/8/418)
Supplement: s1 [file s1]

Supplemental information for the paper:

*Grain Boundary Regulates Friction Behaviors between Graphene and Gold Substrate*

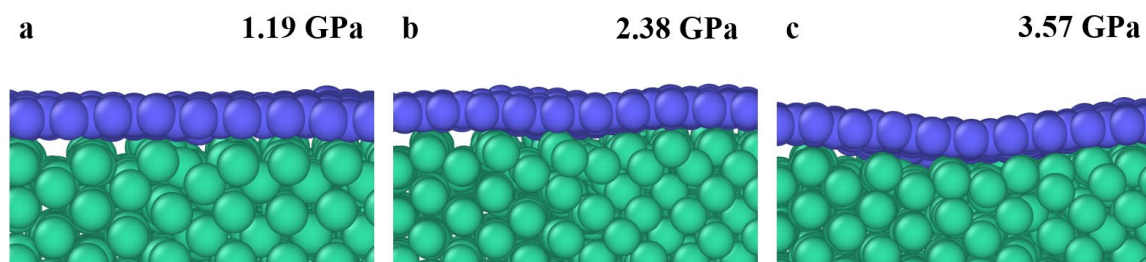

**Figure S1.** The images of the deformed samples with different pressures of (a) 1.19 GPa, (b) 2.38 GPa, (c) 3.57 GPa.
